# Supplementary material for: Electrochemical behavior of eriocitrin and highly sensitive determination based on an electrochemically reduced graphene oxide modified glassy carbon electrode
Source: Royal Society of Chemistry journal article supplement (doi:10.1039/c6ay00064a), 2016-01-01
Supplement: c6ay00064a1.pdf [file c6ay00064a1.pdf]

## Electronic Supplementary Information (ESI)

### **Electrochemical behavior of eriocitrin and high sensitive determination based on the electrochemically reduced graphene oxide modified glassy carbon electrode**

Shuyu Yao, Wanling Cai, Lin Liu, Xueqing Liao, Kaili Tao, Fang Feng\* and Gongjun Yang\*

Key Laboratory of Drug Quality Control and Pharmacovigilance (China Pharmaceutical University), Ministry of Education, School of Pharmacy, China Pharmaceutical University, Nanjing 210009, P. R. China

e-mail: [gjyang@cpu.edu.cn](mailto:gjyang@cpu.edu.cn), [fengfang1@126.com](mailto:fengfang1@126.com)

**Fig. S1** Cyclic voltammograms of  $0.5 \text{ mmol L}^{-1} \text{ Ru(NH}_3)_6^{2+/3+}$  (internal standard) in pH 7.0 PBS containing  $0.1 \text{ mol L}^{-1} \text{ KCl}$  at ERGO (a) and bare GCE (b). Scan rate:  $100 \text{ mV s}^{-1}$ .

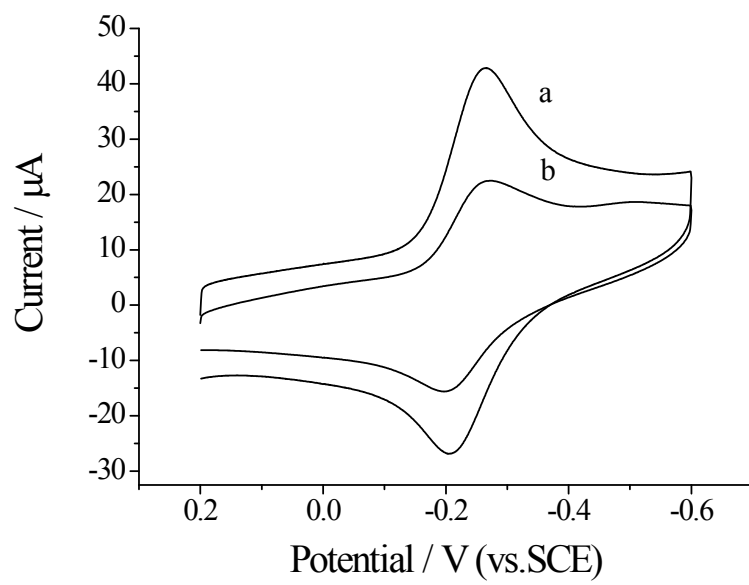

**Fig. S2** The differential pulse voltammograms of 50.0 ng mL<sup>-1</sup> eriocitrin for the representative interference tests

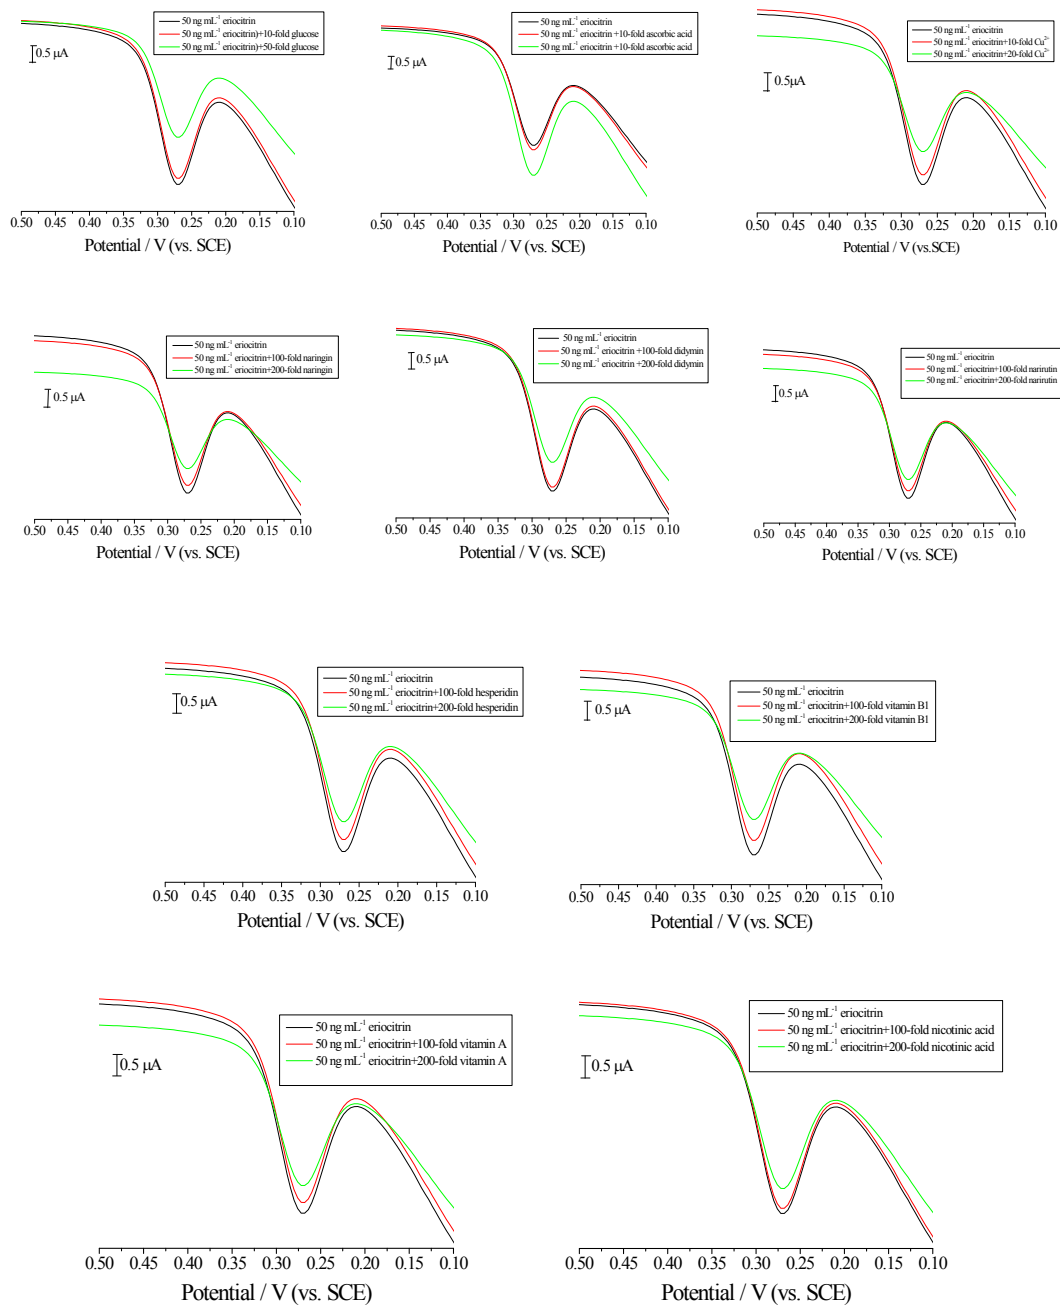

**Table S1** The peak positions of characteristic bands and the  $\frac{I_D}{I_G}$  ratio for the GO and

ERGO

|      | D-band<br>(cm <sup>-1</sup> ) | G-band<br>(cm <sup>-1</sup> ) | 2D-band<br>(cm <sup>-1</sup> ) | (G+D)-band<br>(cm <sup>-1</sup> ) | 2G-band<br>(cm <sup>-1</sup> ) | $\frac{I_D}{I_G}$<br>(%) |
|------|-------------------------------|-------------------------------|--------------------------------|-----------------------------------|--------------------------------|--------------------------|
| GO   | 1355.73                       | 1603.24                       | 2704.10                        | 2951.38                           | 3183.52                        | 0.90                     |
| ERGO | 1351.47                       | 1600.48                       | 2688.65                        | 2947.94                           | 3206.75                        | 1.34                     |

**Table S2** De-convolution of the functional group percentages *via* XPS for GO and

ERGO.

|      | C=C/C-C<br>at % | C-O<br>at % | C=O<br>at % | HO-C=O<br>at % |
|------|-----------------|-------------|-------------|----------------|
| GO   | 40.63           | 48.38       | 6.46        | 4.52           |
| ERGO | 61.01           | 36.12       | 1.50        | 1.37           |
